# Supplementary material
Source: PubMed Central journal article supplement (PMC5171236)
Supplement: NIHMS818810-supplement-Supplemental_Data_File__doc__pdf__etc__.pdf [file NIHMS818810-supplement-Supplemental_Data_File__doc__pdf__etc__.pdf]

Posterior summary  
Group: Group number 1

|                                  | Mean   | S.E.  | S.D.  | C.S.  | 95%<br>Lower<br>bound | 95%<br>Upper<br>bound | Skewness | Kurtosis | Min    |
|----------------------------------|--------|-------|-------|-------|-----------------------|-----------------------|----------|----------|--------|
| <b>Regression weights</b>        |        |       |       |       |                       |                       |          |          |        |
| ZEPDS_TOTAL<--ZESI_TOTAL         | 0.395  | 0.002 | 0.045 | 1.001 | 0.308                 | 0.484                 | 0.087    | 0.007    | 0.230  |
| Smk_Grp<--ZEPDS_TOTAL            | 0.169  | 0.001 | 0.037 | 1.001 | 0.095                 | 0.241                 | -0.073   | 0.044    | 0.020  |
| ZARI_TOT<--SES                   | 0.154  | 0.002 | 0.048 | 1.001 | 0.060                 | 0.247                 | 0.021    | 0.029    | -0.020 |
| ZESI_TOTAL<--SES                 | -0.204 | 0.001 | 0.048 | 1.000 | -0.298                | -0.111                | 0.031    | -0.116   | -0.375 |
| ZEPDS_TOTAL<--ZARI_TOT           | -0.273 | 0.002 | 0.048 | 1.001 | -0.365                | -0.177                | 0.060    | -0.036   | -0.439 |
| Smk_Grp<--Q19CODED               | 0.857  | 0.003 | 0.085 | 1.000 | 0.691                 | 1.026                 | 0.076    | 0.297    | 0.540  |
| ZEPDS_TOTAL<--Q19CODED           | 0.143  | 0.004 | 0.097 | 1.001 | -0.047                | 0.338                 | -0.002   | 0.141    | -0.283 |
| ZESI_TOTAL<--Q19CODED            | 0.323  | 0.006 | 0.125 | 1.001 | 0.084                 | 0.569                 | 0.031    | -0.089   | -0.128 |
| ZARI_TOT<--Q19CODED              | -0.031 | 0.005 | 0.114 | 1.001 | -0.251                | 0.198                 | 0.075    | 0.024    | -0.508 |
| ZESI_TOTAL<--Q40                 | 0.034  | 0.000 | 0.011 | 1.001 | 0.013                 | 0.055                 | -0.093   | 0.029    | -0.005 |
| ZEPDS_TOTAL<--Q40                | 0.005  | 0.000 | 0.009 | 1.001 | -0.012                | 0.022                 | 0.068    | -0.101   | -0.025 |
| Smk_Grp<--Q40                    | -0.005 | 0.000 | 0.007 | 1.001 | -0.020                | 0.009                 | -0.035   | 0.019    | -0.034 |
| ZARI_TOT<--Q40                   | -0.007 | 0.000 | 0.011 | 1.001 | -0.027                | 0.014                 | 0.011    | 0.033    | -0.056 |
| ZESI_TOTAL<--maritalcat_recoded  | -0.320 | 0.003 | 0.130 | 1.000 | -0.574                | -0.068                | 0.013    | -0.120   | -0.737 |
| ZEPDS_TOTAL<--maritalcat_recoded | -0.166 | 0.004 | 0.101 | 1.001 | -0.371                | 0.031                 | -0.078   | 0.030    | -0.595 |
| Smk_Grp<--maritalcat_recoded     | -0.034 | 0.005 | 0.094 | 1.001 | -0.216                | 0.154                 | 0.053    | -0.001   | -0.361 |
| ZARI_TOT<--maritalcat_recoded    | 0.020  | 0.005 | 0.124 | 1.001 | -0.223                | 0.259                 | -0.063   | -0.192   | -0.388 |
| ZESI_TOTAL<--race                | -0.139 | 0.004 | 0.120 | 1.001 | -0.380                | 0.097                 | -0.027   | 0.040    | -0.698 |
| ZEPDS_TOTAL<--race               | -0.074 | 0.003 | 0.101 | 1.000 | -0.271                | 0.118                 | -0.048   | -0.045   | -0.436 |
| Smk_Grp<--race                   | 0.066  | 0.003 | 0.089 | 1.001 | -0.109                | 0.247                 | 0.103    | 0.161    | -0.272 |
| ZARI_TOT<--race                  | 0.349  | 0.004 | 0.120 | 1.001 | 0.123                 | 0.598                 | 0.196    | 0.107    | -0.070 |
| ZESI_TOTAL<--Term_Recoded        | 0.168  | 0.005 | 0.130 | 1.001 | -0.083                | 0.416                 | 0.026    | -0.252   | -0.286 |
| ZEPDS_TOTAL<--Term_Recoded       | 0.212  | 0.003 | 0.102 | 1.000 | 0.008                 | 0.408                 | -0.067   | 0.075    | -0.242 |
| Smk_Grp<--Term_Recoded           | 0.267  | 0.004 | 0.084 | 1.001 | 0.102                 | 0.434                 | 0.037    | 0.077    | -0.045 |
| ZARI_TOT<--Term_Recoded          | -0.150 | 0.005 | 0.125 | 1.001 | -0.395                | 0.095                 | 0.029    | -0.032   | -0.597 |
| ZESI_TOTAL<--SITE                | 0.102  | 0.004 | 0.141 | 1.000 | -0.175                | 0.370                 | -0.093   | 0.022    | -0.463 |
| ZEPDS_TOTAL<--SITE               | 0.133  | 0.006 | 0.117 | 1.001 | -0.098                | 0.356                 | -0.041   | -0.144   | -0.282 |
| Smk_Grp<--SITE                   | 0.259  | 0.003 | 0.096 | 1.000 | 0.071                 | 0.450                 | 0.076    | -0.022   | -0.096 |
| ZARI_TOT<--SITE                  | -0.584 | 0.005 | 0.137 | 1.001 | -0.842                | -0.304                | 0.178    | 0.108    | -1.105 |
| <b>Means</b>                     |        |       |       |       |                       |                       |          |          |        |
| SES                              | 2.269  | 0.004 | 0.077 | 1.001 | 2.122                 | 2.424                 | 0.098    | 0.043    | 2.009  |
| Term_Recoded                     | 0.315  | 0.001 | 0.027 | 1.001 | 0.262                 | 0.368                 | -0.031   | -0.177   | 0.224  |
| Q40                              | 25.899 | 0.013 | 0.287 | 1.001 | 25.334                | 26.464                | -0.011   | -0.054   | 24.793 |
| race                             | 0.667  | 0.001 | 0.026 | 1.001 | 0.619                 | 0.719                 | 0.077    | 0.098    | 0.564  |
| maritalcat_recoded               | 1.714  | 0.001 | 0.023 | 1.001 | 1.669                 | 1.760                 | 0.041    | -0.081   | 1.631  |
| Q19CODED                         | 0.274  | 0.001 | 0.024 | 1.001 | 0.227                 | 0.320                 | 0.015    | 0.039    | 0.193  |
| SITE                             | 0.222  | 0.001 | 0.022 | 1.001 | 0.178                 | 0.265                 | -0.076   | -0.004   | 0.131  |
| <b>Intercepts</b>                |        |       |       |       |                       |                       |          |          |        |
| ZESI_TOTAL                       | 0.045  | 0.012 | 0.314 | 1.001 | -0.571                | 0.676                 | 0.046    | 0.061    | -1.055 |

Posterior summary  
Group: Group number 1

|                                   | Mean   | S.E.  | S.D.  | C.S.  | 95%<br>Lower<br>bound | 95%<br>Upper<br>bound | Skewness | Kurtosis | Min    |
|-----------------------------------|--------|-------|-------|-------|-----------------------|-----------------------|----------|----------|--------|
| ZEPDS_TOTAL                       | 0.071  | 0.010 | 0.260 | 1.001 | -0.442                | 0.575                 | -0.021   | -0.016   | -0.833 |
| Smk_Grp                           | 0.456  | 0.011 | 0.235 | 1.001 | 0.000                 | 0.919                 | -0.007   | 0.143    | -0.612 |
| ZARI_TOT                          | -0.251 | 0.012 | 0.304 | 1.001 | -0.826                | 0.384                 | 0.165    | -0.024   | -1.192 |
| <b>Covariances</b>                |        |       |       |       |                       |                       |          |          |        |
| SES<->Term_Recoded                | -0.103 | 0.001 | 0.040 | 1.000 | -0.185                | -0.027                | -0.123   | 0.186    | -0.278 |
| SES<->Q40                         | 3.753  | 0.014 | 0.449 | 1.001 | 2.917                 | 4.662                 | 0.190    | 0.028    | 2.201  |
| SES<->race                        | 0.291  | 0.002 | 0.041 | 1.001 | 0.216                 | 0.374                 | 0.206    | 0.045    | 0.147  |
| SES<->maritalcat_recoded          | 0.299  | 0.002 | 0.039 | 1.001 | 0.228                 | 0.375                 | 0.197    | -0.145   | 0.173  |
| SES<->Q19CODED                    | -0.241 | 0.001 | 0.036 | 1.001 | -0.317                | -0.174                | -0.202   | 0.175    | -0.387 |
| SES<->SITE                        | -0.248 | 0.001 | 0.034 | 1.001 | -0.320                | -0.183                | -0.147   | 0.045    | -0.383 |
| Q40<->Term_Recoded                | 0.236  | 0.006 | 0.144 | 1.001 | -0.041                | 0.537                 | 0.155    | 0.035    | -0.271 |
| race<->Term_Recoded               | -0.013 | 0.001 | 0.014 | 1.001 | -0.040                | 0.014                 | 0.047    | 0.094    | -0.065 |
| maritalcat_recoded<->Term_Recoded | -0.002 | 0.000 | 0.013 | 1.001 | -0.027                | 0.023                 | -0.057   | -0.036   | -0.050 |
| Q19CODED<->Term_Recoded           | -0.002 | 0.001 | 0.012 | 1.002 | -0.025                | 0.023                 | 0.062    | -0.006   | -0.046 |
| Term_Recoded<->SITE               | -0.051 | 0.001 | 0.012 | 1.001 | -0.076                | -0.029                | -0.215   | 0.159    | -0.106 |
| Q40<->race                        | 0.444  | 0.005 | 0.140 | 1.001 | 0.185                 | 0.729                 | 0.139    | 0.178    | -0.114 |
| Q40<->maritalcat_recoded          | 0.778  | 0.004 | 0.135 | 1.000 | 0.523                 | 1.054                 | 0.126    | 0.051    | 0.245  |
| Q19CODED<->Q40                    | -0.656 | 0.004 | 0.135 | 1.000 | -0.935                | -0.399                | -0.133   | 0.061    | -1.168 |
| Q40<->SITE                        | -0.486 | 0.004 | 0.122 | 1.001 | -0.733                | -0.255                | -0.179   | -0.038   | -0.978 |
| maritalcat_recoded<->race         | 0.097  | 0.001 | 0.012 | 1.001 | 0.074                 | 0.122                 | 0.162    | -0.060   | 0.055  |
| Q19CODED<->race                   | -0.012 | 0.001 | 0.012 | 1.001 | -0.036                | 0.011                 | -0.077   | 0.154    | -0.064 |
| race<->SITE                       | -0.072 | 0.001 | 0.012 | 1.001 | -0.096                | -0.049                | -0.109   | -0.042   | -0.118 |
| Q19CODED<->maritalcat_recoded     | -0.044 | 0.000 | 0.011 | 1.001 | -0.067                | -0.023                | -0.122   | -0.108   | -0.087 |
| maritalcat_recoded<->SITE         | -0.042 | 0.000 | 0.011 | 1.001 | -0.064                | -0.021                | -0.087   | 0.187    | -0.085 |
| Q19CODED<->SITE                   | 0.015  | 0.000 | 0.010 | 1.001 | -0.004                | 0.036                 | 0.083    | 0.124    | -0.025 |
| <b>Variances</b>                  |        |       |       |       |                       |                       |          |          |        |
| SES                               | 2.166  | 0.006 | 0.157 | 1.001 | 1.886                 | 2.499                 | 0.353    | 0.115    | 1.678  |
| Q19CODED                          | 0.207  | 0.001 | 0.015 | 1.001 | 0.180                 | 0.237                 | 0.205    | -0.100   | 0.160  |
| Q40                               | 28.688 | 0.093 | 2.138 | 1.001 | 24.761                | 32.955                | 0.252    | 0.143    | 21.687 |
| maritalcat_recoded                | 0.213  | 0.001 | 0.016 | 1.001 | 0.184                 | 0.245                 | 0.251    | 0.080    | 0.163  |
| race                              | 0.233  | 0.001 | 0.018 | 1.001 | 0.201                 | 0.270                 | 0.226    | 0.159    | 0.169  |
| Term_Recoded                      | 0.228  | 0.001 | 0.019 | 1.001 | 0.196                 | 0.270                 | 0.483    | 0.289    | 0.166  |
| SITE                              | 0.182  | 0.000 | 0.013 | 1.001 | 0.158                 | 0.210                 | 0.323    | 0.147    | 0.138  |
| e1                                | 0.821  | 0.003 | 0.063 | 1.001 | 0.704                 | 0.951                 | 0.230    | 0.068    | 0.610  |
| e3                                | 0.790  | 0.002 | 0.059 | 1.001 | 0.681                 | 0.911                 | 0.259    | 0.143    | 0.606  |
| e2                                | 0.595  | 0.003 | 0.045 | 1.002 | 0.516                 | 0.693                 | 0.384    | 0.203    | 0.453  |
| e4                                | 0.439  | 0.001 | 0.034 | 1.001 | 0.379                 | 0.512                 | 0.382    | 0.343    | 0.324  |

Posterior summary  
 Group: Group number 1

|                                  | Max    | Name |
|----------------------------------|--------|------|
| <b>Regression weights</b>        |        |      |
| ZEPDS_TOTAL<--ZESI_TOTAL         | 0.601  |      |
| Smk_Grp<--ZEPDS_TOTAL            | 0.321  |      |
| ZARI_TOT<--SES                   | 0.354  |      |
| ZESI_TOTAL<--SES                 | -0.014 |      |
| ZEPDS_TOTAL<--ZARI_TOT           | -0.093 |      |
| Smk_Grp<--Q19CODED               | 1.238  |      |
| ZEPDS_TOTAL<--Q19CODED           | 0.519  |      |
| ZESI_TOTAL<--Q19CODED            | 0.749  |      |
| ZARI_TOT<--Q19CODED              | 0.477  |      |
| ZESI_TOTAL<--Q40                 | 0.075  |      |
| ZEPDS_TOTAL<--Q40                | 0.036  |      |
| Smk_Grp<--Q40                    | 0.023  |      |
| ZARI_TOT<--Q40                   | 0.035  |      |
| ZESI_TOTAL<--maritalcat_recoded  | 0.168  |      |
| ZEPDS_TOTAL<--maritalcat_recoded | 0.173  |      |
| Smk_Grp<--maritalcat_recoded     | 0.343  |      |
| ZARI_TOT<--maritalcat_recoded    | 0.452  |      |
| ZESI_TOTAL<--race                | 0.283  |      |
| ZEPDS_TOTAL<--race               | 0.293  |      |
| Smk_Grp<--race                   | 0.402  |      |
| ZARI_TOT<--race                  | 0.837  |      |
| ZESI_TOTAL<--Term_Recoded        | 0.607  |      |
| ZEPDS_TOTAL<--Term_Recoded       | 0.606  |      |
| Smk_Grp<--Term_Recoded           | 0.626  |      |
| ZARI_TOT<--Term_Recoded          | 0.325  |      |
| ZESI_TOTAL<--SITE                | 0.623  |      |
| ZEPDS_TOTAL<--SITE               | 0.556  |      |
| Smk_Grp<--SITE                   | 0.625  |      |
| ZARI_TOT<--SITE                  | -0.003 |      |
| <b>Means</b>                     |        |      |
| SES                              | 2.557  |      |
| Term_Recoded                     | 0.402  |      |
| Q40                              | 26.889 |      |
| race                             | 0.765  |      |
| maritalcat_recoded               | 1.796  |      |
| Q19CODED                         | 0.372  |      |
| SITE                             | 0.297  |      |
| <b>Intercepts</b>                |        |      |
| ZESI_TOTAL                       | 1.198  |      |

Posterior summary  
 Group: Group number 1

|                                   | Max    | Name |
|-----------------------------------|--------|------|
| ZEPDS_TOTAL                       | 0.986  |      |
| Smk_Grp                           | 1.394  |      |
| ZARI_TOT                          | 0.933  |      |
| <b>Covariances</b>                |        |      |
| SES<->Term_Recoded                | 0.050  |      |
| SES<->Q40                         | 5.705  |      |
| SES<->race                        | 0.474  |      |
| SES<->maritalcat_recoded          | 0.471  |      |
| SES<->Q19CODED                    | -0.101 |      |
| SES<->SITE                        | -0.118 |      |
| Q40<->Term_Recoded                | 0.832  |      |
| race<->Term_Recoded               | 0.035  |      |
| maritalcat_recoded<->Term_Recoded | 0.047  |      |
| Q19CODED<->Term_Recoded           | 0.059  |      |
| Term_Recoded<->SITE               | -0.009 |      |
| Q40<->race                        | 1.034  |      |
| Q40<->maritalcat_recoded          | 1.266  |      |
| Q19CODED<->Q40                    | -0.157 |      |
| Q40<->SITE                        | -0.081 |      |
| maritalcat_recoded<->race         | 0.145  |      |
| Q19CODED<->race                   | 0.032  |      |
| race<->SITE                       | -0.031 |      |
| Q19CODED<->maritalcat_recoded     | 0.002  |      |
| maritalcat_recoded<->SITE         | -0.003 |      |
| Q19CODED<->SITE                   | 0.055  |      |
| <b>Variances</b>                  |        |      |
| SES                               | 2.803  |      |
| Q19CODED                          | 0.266  |      |
| Q40                               | 40.039 |      |
| maritalcat_recoded                | 0.275  |      |
| race                              | 0.307  |      |
| Term_Recoded                      | 0.315  |      |
| SITE                              | 0.239  |      |
| e1                                | 1.073  |      |
| e3                                | 1.059  |      |
| e2                                | 0.780  |      |
| e4                                | 0.612  |      |

|             | SITE   | Term_Recoded | race   | maritalcat_recoded | Q40    | Q19CODED | SES    | ZARL_TOT | ZESI_TOTAL | ZEPDS_TOTAL |
|-------------|--------|--------------|--------|--------------------|--------|----------|--------|----------|------------|-------------|
| ZARL_TOT    | -0.584 | -0.150       | 0.349  | 0.020              | -0.007 | -0.031   | 0.154  | 0.000    | 0.000      | 0.000       |
| ZESI_TOTAL  | 0.102  | 0.168        | -0.139 | -0.320             | 0.034  | 0.323    | -0.204 | 0.000    | 0.000      | 0.000       |
| ZEPDS_TOTAL | 0.133  | 0.212        | -0.074 | -0.166             | 0.005  | 0.143    | 0.000  | -0.273   | 0.395      | 0.000       |
| Smk_Grp     | 0.259  | 0.267        | 0.066  | -0.034             | -0.005 | 0.857    | 0.000  | 0.000    | 0.000      | 0.169       |

- Direct Effects
- Implied Correlations
- Implied Covariance
- Mean
- Standard error
- Standard deviation
- Convergence statistic
- 95% Lower bound
- 95% Upper bound
- Skewness
- Kurtosis
- Min
- Max

- Group number 1
- Direct Effects
- Implied Correlations
- Implied Covariance
- Mean
- Standard error
- Standard deviation
- Convergence statistic
- 95% Lower bound
- 95% Upper bound
- Skewness
- Kurtosis
- Min
- Max

|             | SITE   | Term_Recoded | race   | maritalcat_recoded | Q40    | Q19CODED | SES    | ZARL_TOT | ZESL_TOTAL | ZEPDS_TOTAL |
|-------------|--------|--------------|--------|--------------------|--------|----------|--------|----------|------------|-------------|
| ZARL_TOT    | -0.584 | -0.150       | 0.349  | 0.020              | -0.007 | -0.031   | 0.154  | 0.000    | 0.000      | 0.000       |
| ZESL_TOTAL  | 0.102  | 0.168        | -0.139 | -0.320             | 0.034  | 0.323    | -0.204 | 0.000    | 0.000      | 0.000       |
| ZEPDS_TOTAL | 0.133  | 0.212        | -0.074 | -0.166             | 0.005  | 0.143    | 0.000  | -0.273   | 0.395      | 0.000       |
| Smk_Grp     | 0.259  | 0.267        | 0.066  | -0.034             | -0.005 | 0.857    | 0.000  | 0.000    | 0.000      | 0.169       |
